# Supplementary material for: Mechanochemically assisted hydrolysis in the ADOR process
Source: Royal Society of Chemistry journal article supplement (doi:10.1039/d0sc02547j), 2020-01-01
Supplement: d0sc02547j1.pdf [file d0sc02547j1.pdf]

## Electronic Supporting Information

### Mechanochemically assisted hydrolysis in the ADOR process

Daniel N. Rainer<sup>a</sup>, Cameron M. Rice<sup>a</sup>, Stewart, J. Warrender,<sup>a</sup> Sharon E. Ashbrook<sup>a</sup> and Russell E. Morris<sup>a,b,\*</sup>

<sup>a</sup>School of Chemistry, EaStCHEM, University of St. Andrews, North Haugh, St. Andrews, Fife, KY16 9ST, UK.

<sup>b</sup>Department of Physical and Macromolecular Chemistry, Faculty of Sciences, Charles University, Hlavova 8, 128 43 Prague 2, Czech Republic.

|                                                                                                                                                                                                  |   |
|--------------------------------------------------------------------------------------------------------------------------------------------------------------------------------------------------|---|
| Figure S1: <sup>1</sup> H NMR of the OSDA (6R,10S)-6,10-dimethyl-5-azoniaspiro[4.5]decane bromide.                                                                                               | 2 |
| Figure S2: <sup>13</sup> C NMR of the OSDA (6R,10S)-6,10-dimethyl-5-azoniaspiro[4.5]decane bromide.                                                                                              | 2 |
| Figure S3: PXRD patterns of as made materials produced from ball milling UTL in varying concentrations of hydrochloric acid.                                                                     | 3 |
| Figure S4: PXRD patterns of reassembled materials produced from ball milling UTL in varying concentrations of hydrochloric acid.                                                                 | 3 |
| Figure S5: PXRD patterns of as made materials produced from ball milling UTL in 9 M hydrochloric acid for different times.                                                                       | 4 |
| Figure S6: PXRD patterns of reassembled materials produced from ball milling UTL in 9 M hydrochloric acid for different times.                                                                   | 4 |
| Figure S7: PXRD patterns of as made materials produced from ball milling UTL in 12 M hydrochloric acid for different times.                                                                      | 5 |
| Figure S8: PXRD patterns of reassembled materials produced from ball milling UTL in 12 M hydrochloric acid for different times.                                                                  | 5 |
| Figure S9: PXRD patterns of as made materials produced from ball milling UTL with different volumes of water.                                                                                    | 6 |
| Figure S10: PXRD patterns of reassembled materials produced from ball milling UTL with different volumes of water.                                                                               | 6 |
| Figure S11: SEM images of various ball milled and reassembled samples.                                                                                                                           | 7 |
| Figure S12: TEM images with FFT inserts.                                                                                                                                                         | 8 |
| Figure S13: <sup>29</sup> Si (9.4 T, 14 kHz) MAS NMR spectrum of calcined UTL, ball milled in 40% H <sub>2</sub> <sup>17</sup> O for 30 minutes and dehydrated under vacuum at 120 °C overnight. | 9 |

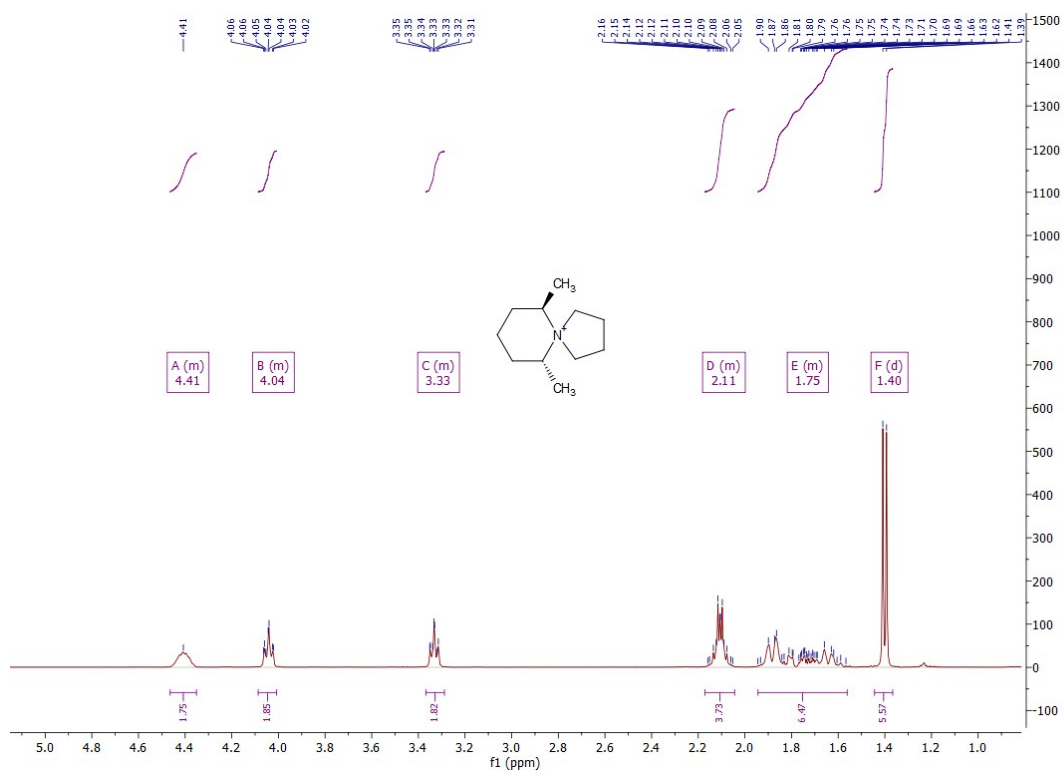

Figure S1:  $^1\text{H}$  NMR of the OSDA (6R,10S)-6,10-dimethyl-5-azoniaspiro[4.5]decane bromide.

$^1\text{H}$  NMR (400 MHz, Chloroform- $d$ )  $\delta$  4.46–4.35 (m, 2H,  $\text{NCH}$ ), 4.09–4.01 (m, 2H,  $\text{NCH}_2$ ), 3.37–3.29 (m, 2H,  $\text{NCH}_2$ ), 2.17–2.04 (m, 4H,  $\text{NCH}_2\text{CH}_2$ ), 1.94–1.56 (m, 6H,  $\text{CH}_2\text{CH}_2\text{CH}_2\text{CHN}$ ), 1.40 (d,  $J = 6.5$  Hz, 6H,  $\text{CH}_3$ ).

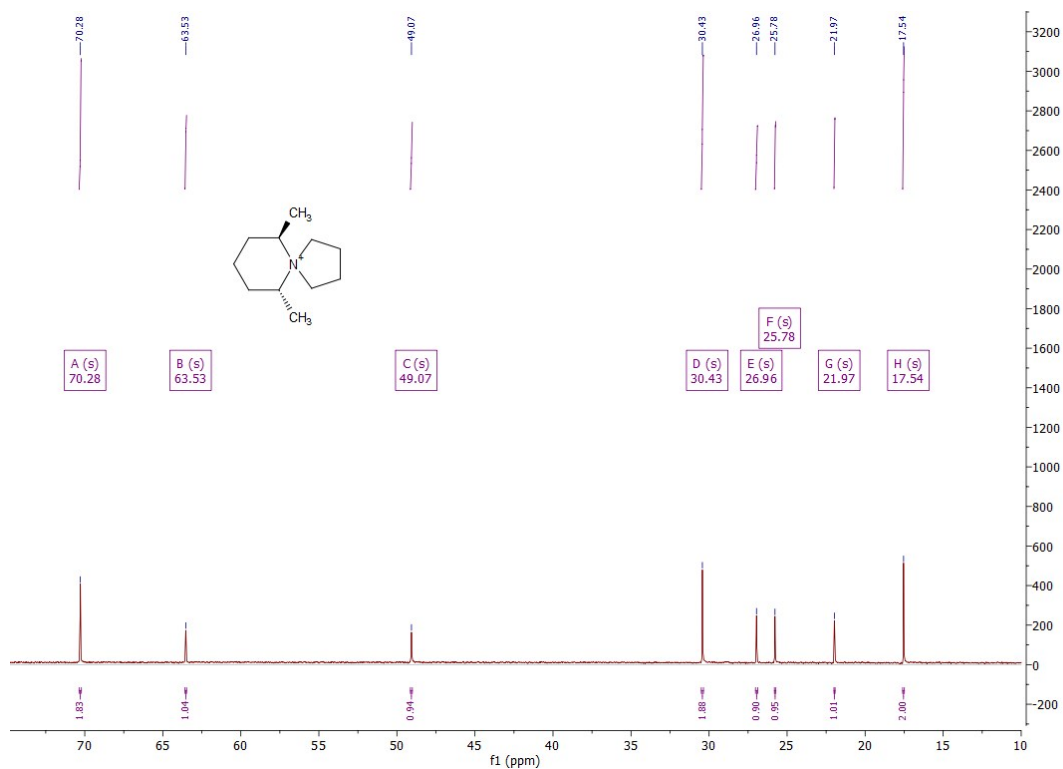

Figure S2:  $^{13}\text{C}$  NMR of the OSDA (6R,10S)-6,10-dimethyl-5-azoniaspiro[4.5]decane bromide.

$^{13}\text{C}$  NMR (126 MHz, Chloroform- $d$ )  $\delta$  70.28, 63.53, 49.07, 30.43, 26.96, 25.78, 21.97, 17.54.

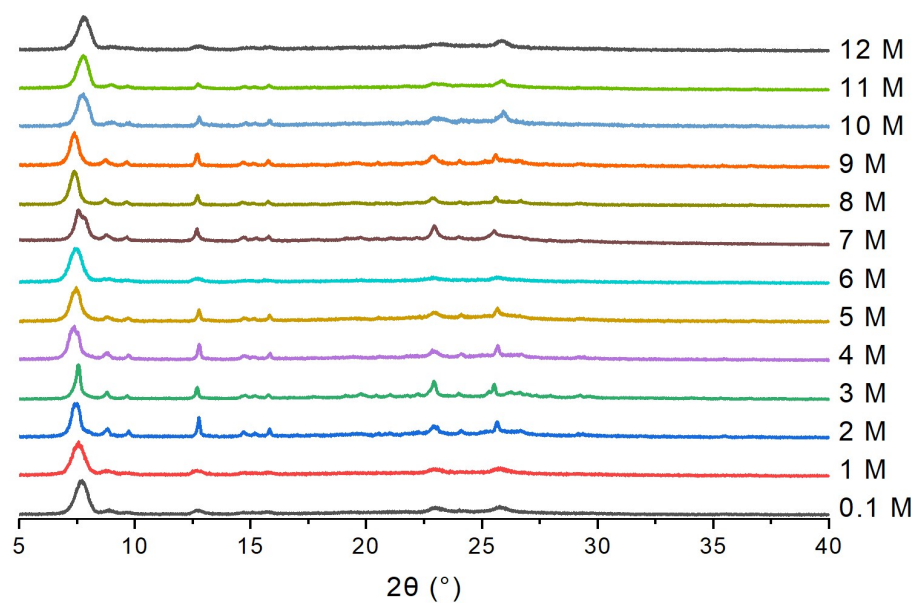

Figure S3: PXRD patterns of as made materials produced from ball milling UTL in varying concentrations of hydrochloric acid.

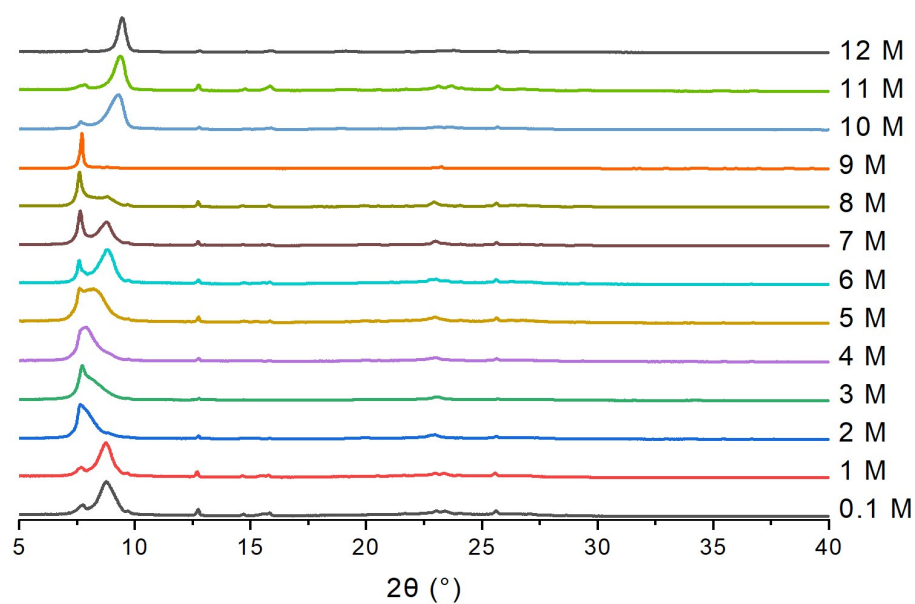

Figure S4: PXRD patterns of reassembled materials produced from ball milling UTL in varying concentrations of hydrochloric acid.

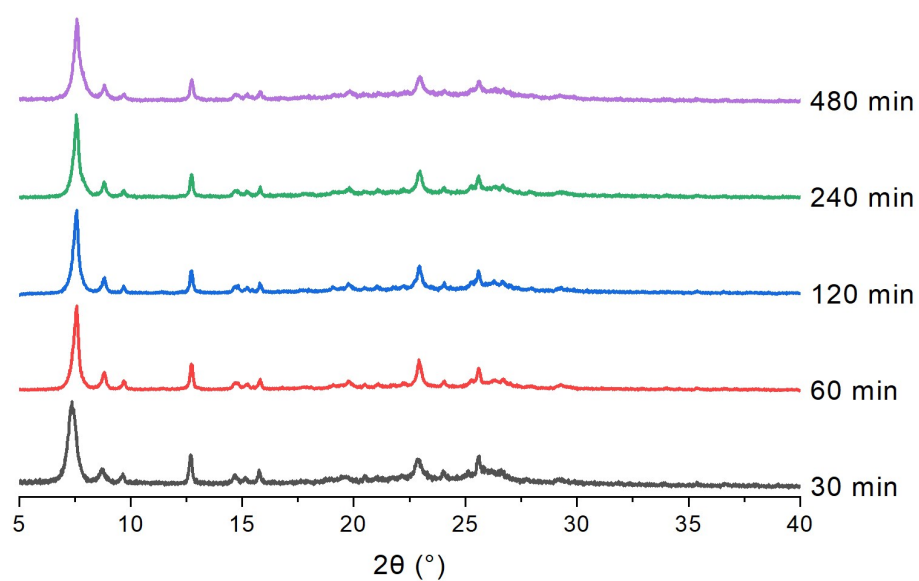

Figure 5: PXRD patterns of as made materials produced from ball milling UTL in 9 M hydrochloric acid for different times.

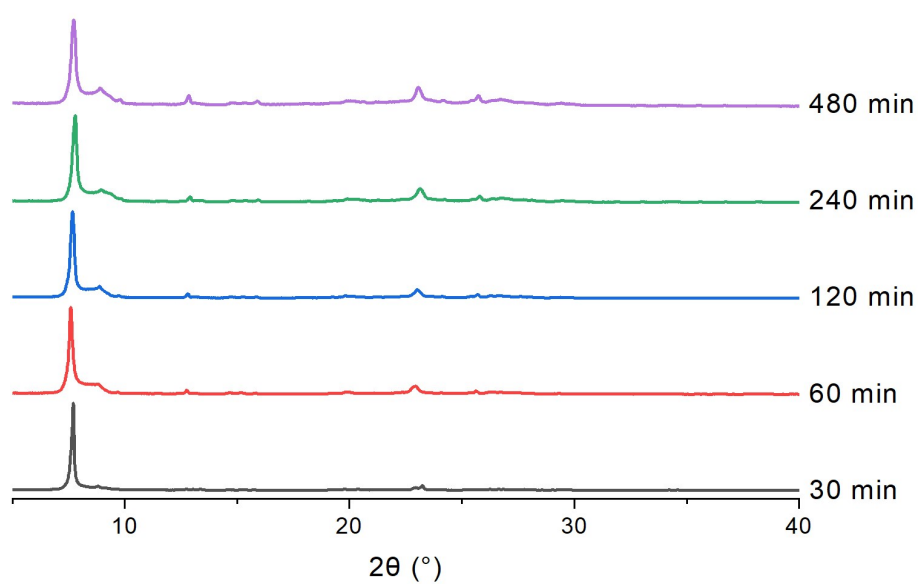

Figure 6: PXRD patterns of reassembled materials produced from ball milling UTL in 9 M hydrochloric acid for different times.

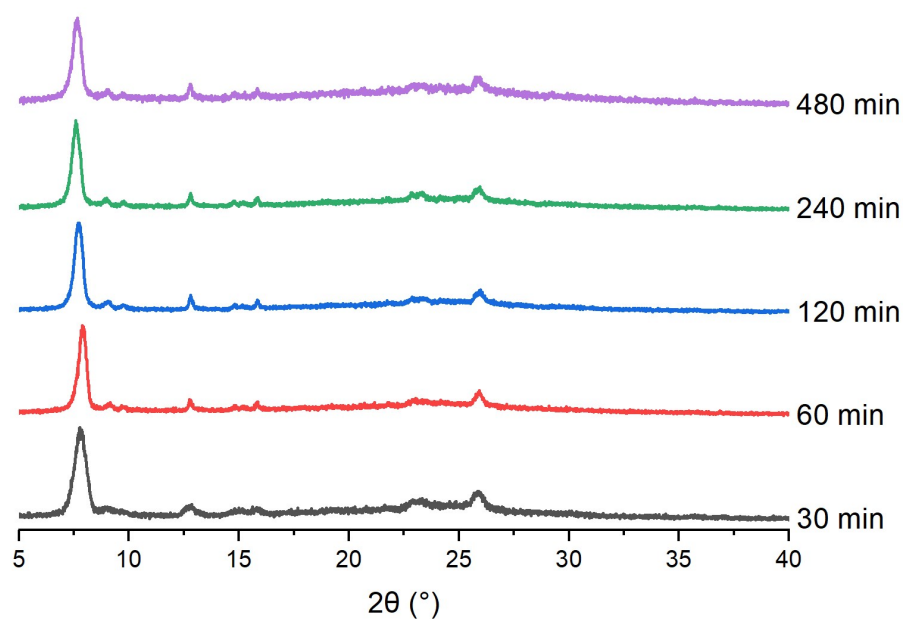

Figure S7: PXRD patterns of as made materials produced from ball milling UTL in 12 M hydrochloric acid for different times.

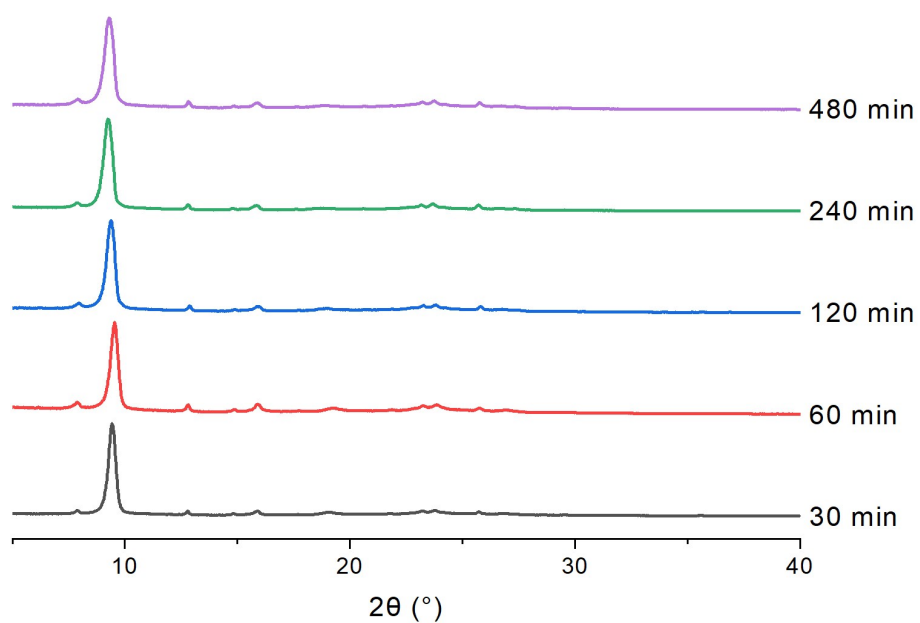

Figure S8: PXRD patterns of reassembled materials produced from ball milling UTL in 12 M hydrochloric acid for different times.

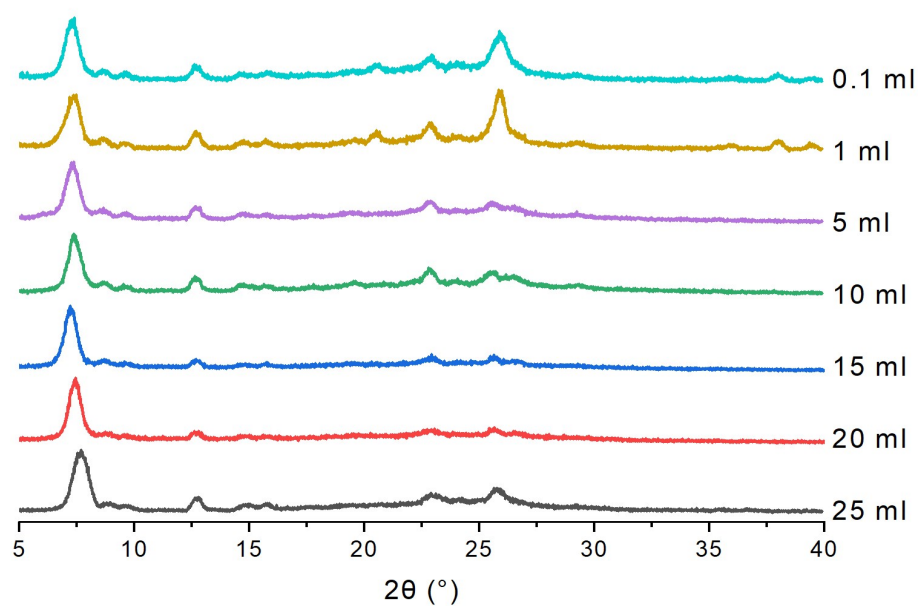

Figure S9: PXRD patterns of as made materials produced from ball milling UTL with different volumes of water.

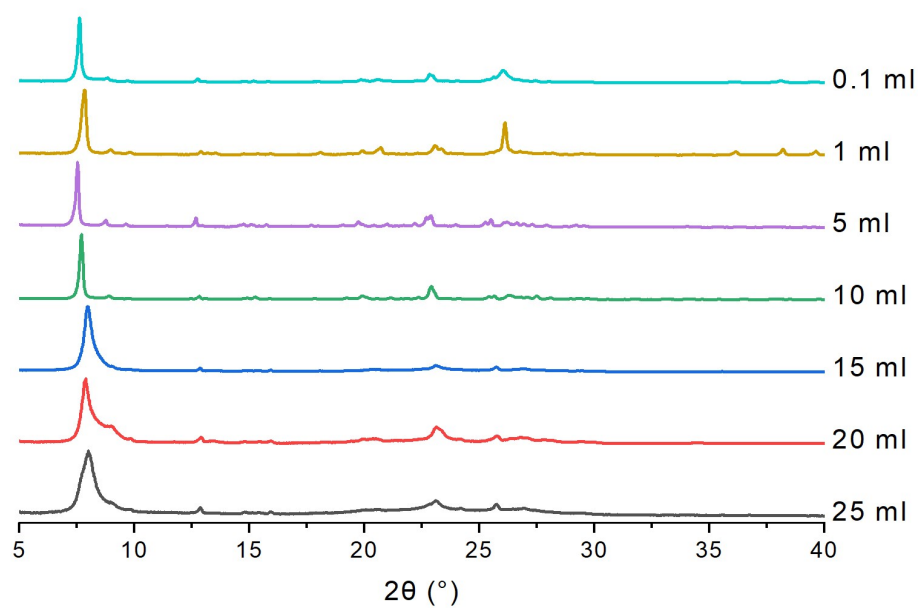

Figure S10: PXRD patterns of reassembled materials produced from ball milling UTL with different volumes of water.

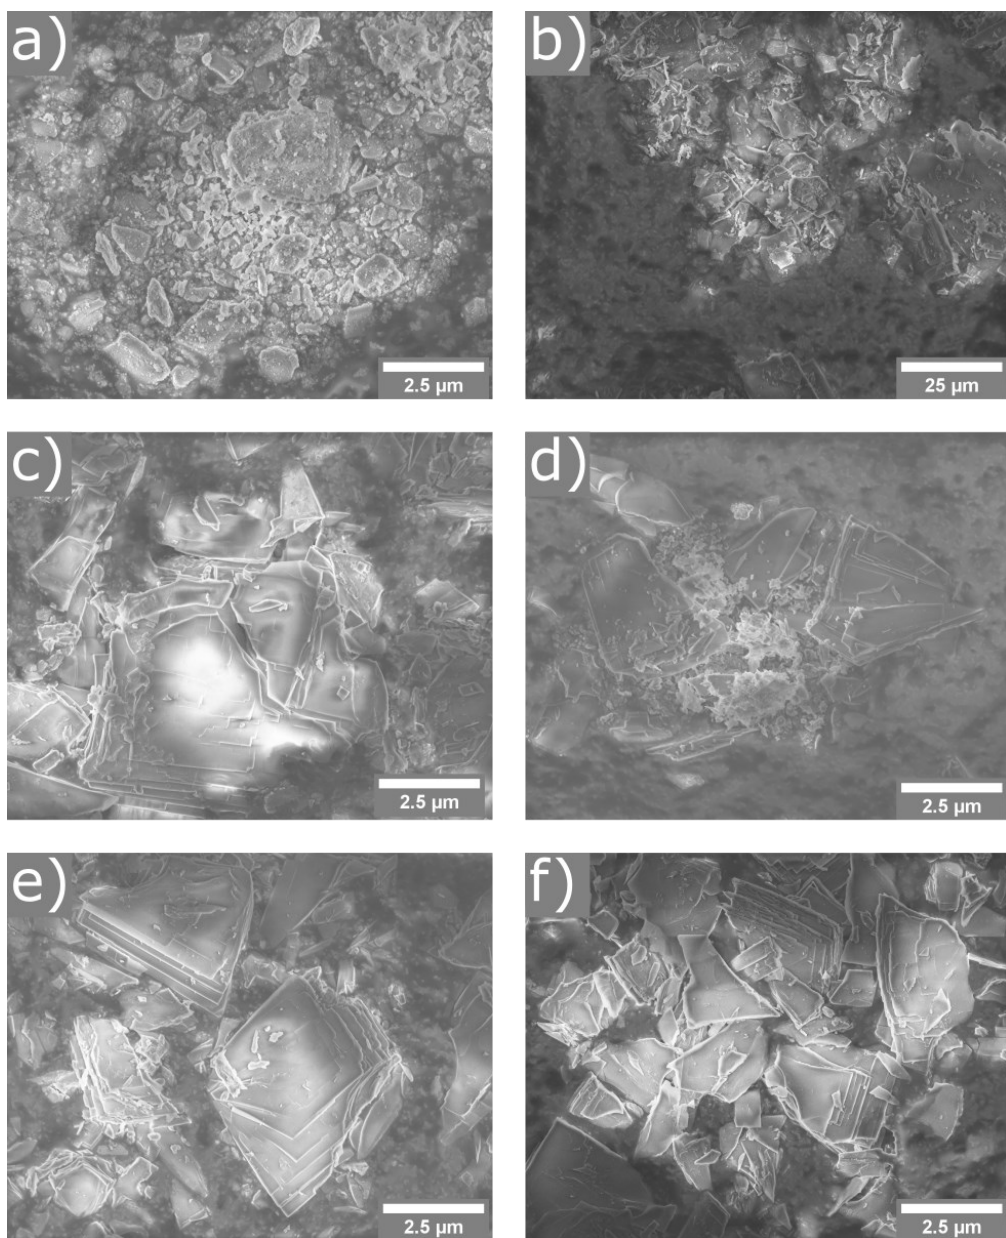

*Figure S11: SEM images of various ball milled and reassembled samples.*

*a) 25 ml water; b) 5 ml water; c) 0.1 ml water; d) 6 M HCl; e) 9 M HCl; f) 12 M HCl.*

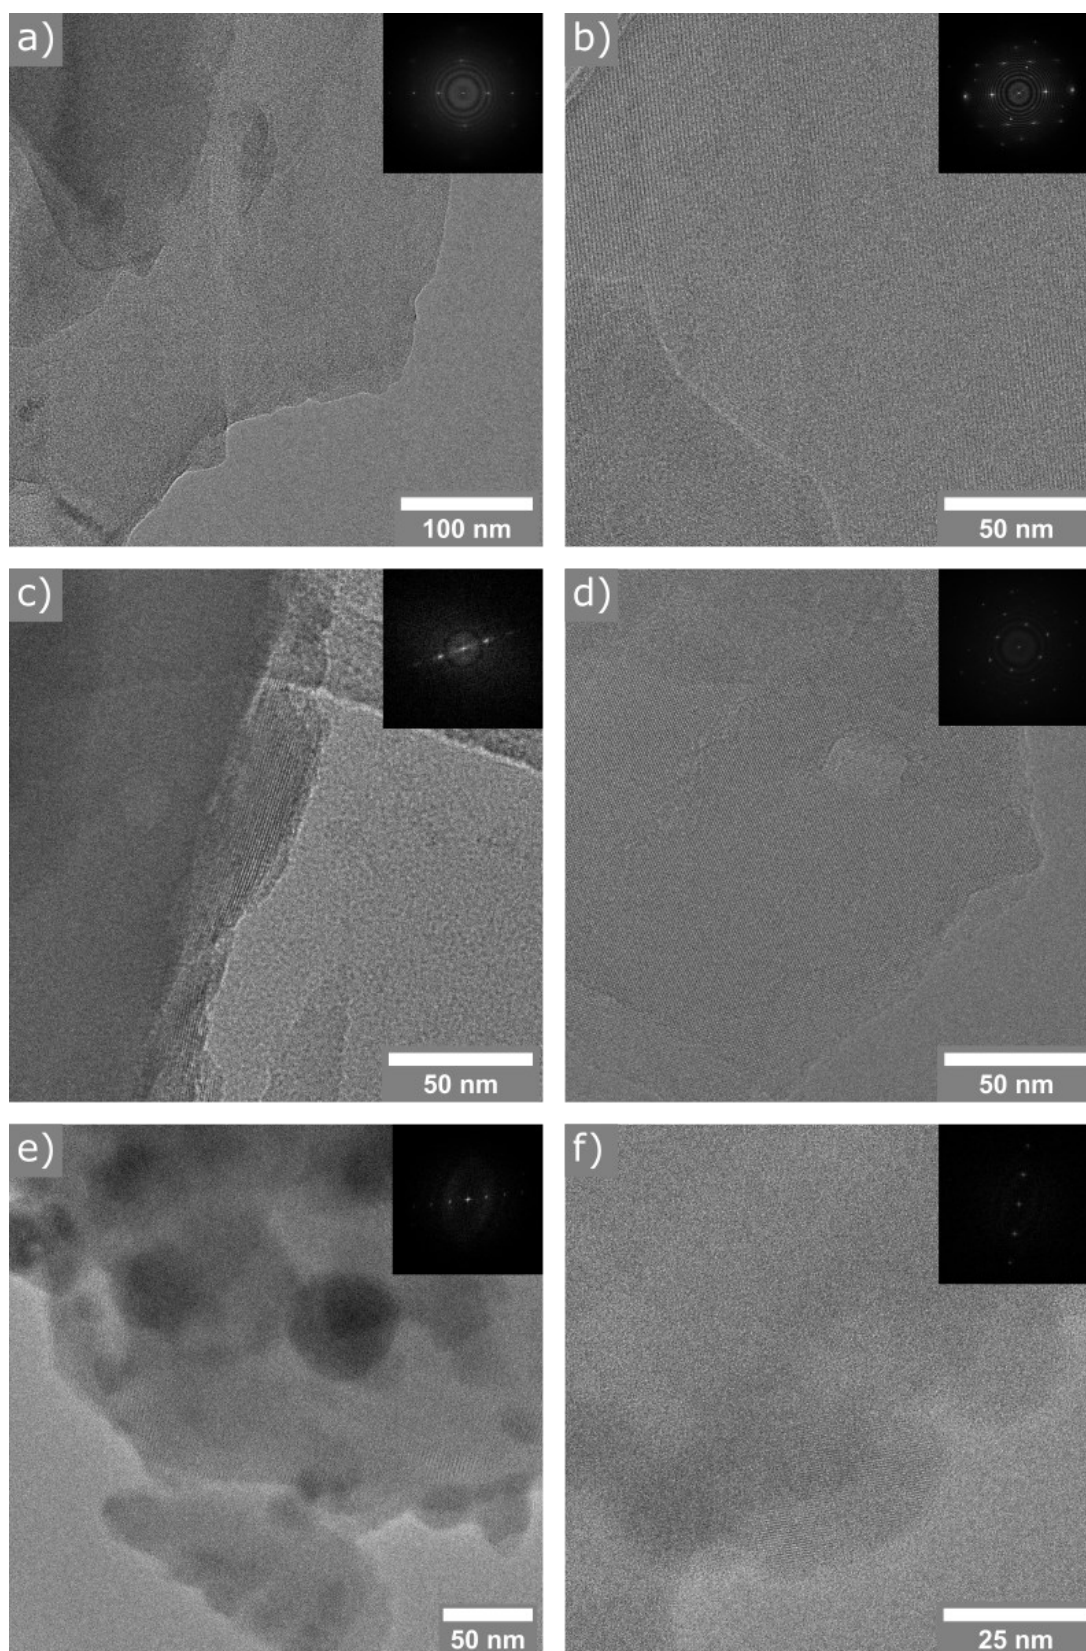

Figure S12: TEM images with FFT inserts.

a) 12 M, crystal of a minor IPC-6 phase (d-spacing 10.1 Å); b) 12 M, two overlapping crystals; c) 9 M, lattice fringes corresponding to IPC-2 (d-spacing 11.3 Å); d) 9 M, view along the [101] direction; e) 0.1 ml water, lattice fringes corresponding to IPC-2 (d-spacing 11.2 Å); f) 0.1 ml water, showing a GeO<sub>2</sub> nanoparticle impurity.



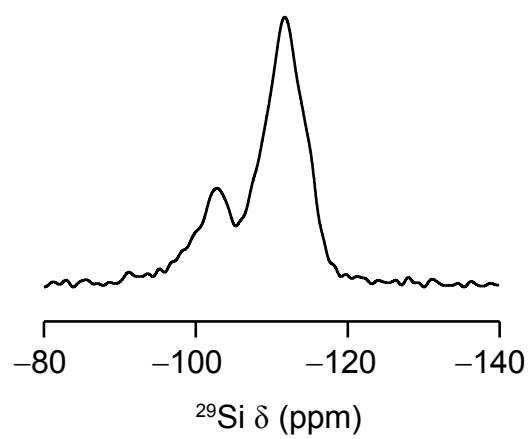

Figure 13:  $^{29}\text{Si}$  (9.4 T, 14 kHz) MAS NMR spectrum of calcined UTL, ball milled in 40%  $\text{H}_2^{17}\text{O}$  for 30 minutes and dehydrated under vacuum at 120 °C overnight.
